# Supplementary material for: Tfh2 and a subset of Tfh1 cells associate with antibody-mediated immunity to malaria
Source: JCI journal article supplement (doi:10.1172/jci.insight.196828), 2025-10-21
Supplement: sd1 [file 1]

1 **Supplementary Figures and Tables**

2 **Supplementary Tables.**

3 ***Supplementary Table S1:*** Cluster markers for pTfh clusters in healthy donors *attached as excel*

4 ***Supplementary Table S2:*** DEGs between Tfh1\_cyto and Tfh1\_CCR7 clusters *attached as excel*

5 ***Supplementary Table S3: Phenotyping panel***

| <u>Target</u>         | <u>Fluorochrome</u> | <u>Clone</u> | <u>Manufacturer</u>        | <u>Catalog #</u> | <u>Dilution</u> |
|-----------------------|---------------------|--------------|----------------------------|------------------|-----------------|
| LAG-3                 | BUV661              | 3DS223H      | Invitrogen                 | 376-2239-42      | 1 in 25         |
| CD49b                 | FITC                | eBioY418     | Invitrogen                 | 11-0498-42       | 1 in 50         |
| CD25                  | BUV395              | 2A3          | BD Biosciences             | 564034           | 1 in 100        |
| CXCR5                 | BUV615              | MU5UBEE      | Invitrogen                 | 366-9185-42      | 1 in 50         |
| CXCR3                 | BV421               | 1C6/CXCR3    | BD Biosciences             | 562558           | 1 in 25         |
| CCR6                  | BV605               | 11A9         | BD Biosciences             | 562724           | 1 in 50         |
| OX40                  | BV650               | ACT35        | BD Biosciences             | 563658           | 1 in 50         |
| CCR7                  | BV711               | 150503       | BD Biosciences             | 566602           | 1 in 50         |
| CD3                   | BV786               | UCHT1        | BD Biosciences             | 565491           | 1 in 500        |
| CD4                   | Spark blue 574      | SK3          | Biolegend                  | 389714           | 1 in 100        |
| CD69                  | PerCP-eFluor 710    | FN50         | ThermoFisher               | 46-0699-42       | 1 in 100        |
| TIM-3                 | PE-CF594            | 7D3          | BD Biosciences             | 565560           | 1 in 50         |
| PD-1                  | PE-Fire 640         | EH12.2H7     | Biolegend                  | 329968           | 1 in 50         |
| TIGIT                 | PE-Fire 810         | A151513G     | Biolegend                  | 372745           | 1 in 100        |
| CD45RA                | redFluor 710        | HI100        | Cytex Biosciences          | 80-0458-T100     | 1 in 400        |
| ICOS                  | APC-H7              | DX29         | BD Biosciences             | 567142           | 1 in 100        |
| CD38                  | APC-Fire 810        | HIT2         | Biolegend                  | 303550           | 1 in 200        |
| Viability             | LD-Blue             |              | ThermoFisher               | L23105           | 1 in 5000       |
|                       |                     |              |                            |                  |                 |
| <b>Intracellular:</b> |                     |              |                            |                  |                 |
| CTLA-4                | BUV737              | 14D3         | ThermoFisher               | 367-1529-42      | 1 in 50         |
| Ki-67                 | BUV805              | B56          | BD Biosciences             | 569636           | 1 in 50         |
| Granzyme B            | BV510               | GB11         | BD Biosciences             | 563388           | 1 in 800        |
| Granzyme K            | RB780               | G3H69        | BD Biosciences             | 569225           | 1 in 50         |
| NKG7                  | PE                  | E6S2A        | Cell Signalling Technology | 84835            | 1 in 2000       |
| c-Maf                 | PECy7               | sym0F1       | ThermoFisher               | 25-9855-82       | 1 in 400        |
| FOXP3                 | RB613               | 259D/C7      | BD Biosciences             | 571087           | 1 in 100        |
| SAP                   | eFluor660           | XLP-1D12     | ThermoFisher               | 50-9787-42       | 1 in 100        |

6

7

8 **Supplementary Table S4: PMA/Jo panel**

| <u>Target</u>         | <u>Fluorochrome</u> | <u>Clone</u>     | <u>Manufacturer</u> | <u>Catalog #</u>  | <u>Dilution</u> |
|-----------------------|---------------------|------------------|---------------------|-------------------|-----------------|
| CD8                   | BUV496              | RPA-T8           | BD Biosciences      | 612942            | 1 in 100        |
| CD45RA                | BUV563              | HI100            | BD Biosciences      | 612926            | 1 in 400        |
| CD3                   | BUV805              | SK7              | BD Biosciences      | 612893            | 1 in 50         |
| CD14/CD19             | BV510               | M5E2 /<br>SJ25C1 | Biologend           | 301842/<br>363019 | 1 in 100        |
| CCR4                  | BV605               | L291H4           | Biologend           | 359418            | 1 in 100        |
| CCR6                  | BV650               | 11A9             | BD Biosciences      | 563922            | 1 in 50         |
| CXCR5                 | BV711               | J252D4           | Biologend           | 356934            | 1 in 50         |
| CD4                   | BV785               | OKT4             | Biologend           | 317442            | 1 in 50         |
| CXCR3                 | PE-CF594            | 1C6/CXCR3        | BD Biosciences      | 562451            | 1 in 50         |
| PD1                   | PE-Cy7              | EH12.1           | BD Biosciences      | 561272            | 1 in 50         |
| Vd2                   | APC-Fire            | B6               | Biologend           | 331420            | 1 in 50         |
| Viability             | LD-blue             |                  | Thermofisher        | L23105            | 1 in 5000       |
|                       |                     |                  |                     |                   |                 |
| <b>Intracellular:</b> |                     |                  |                     |                   |                 |
| IFN $\gamma$          | BUV395              | B27              | BD Biosciences      | 563563            | 1 in 50         |
| IL-10                 | BV421               | JES3-9D7         | Biologend           | 501422            | 1 in 10         |
| TNF                   | BV750               | MAb11            | BD Biosciences      | 566359            | 1 in 100        |
| IL-17a                | FITC                | BL168            | Biologend           | 512304            | 1 in 25         |
| IL-21                 | PE                  | 3A3-N2.1         | BD Biosciences      | 560463            | 1 in 10         |
| IL-4                  | APC                 | MP4-25D2         | Biologend           | 500812            | 1 in 10         |

9

10 **Supplementary Table S5:** Genes used in input for scType prediction *attached as excel*

11 **Supplementary Table S6:** Cluster markers for predicted annotated cell clusters in CHMI data set  
12 *attached as excel*

13 **Supplementary Table S7:** DEGs in each Tfh subset during malaria infection identified by edgeR  
14 *pseudobulk attached as excel*

15

16 **Supplementary Table S8:** Antibody panel for sort purification of Tfh cells for scRNAseq of healthy  
 17 samples

| <u>Target</u> | <u>Fluorochrome</u> | <u>Clone</u> | <u>Manufacturer</u> | <u>Catalog #</u> | <u>Dilution</u> |
|---------------|---------------------|--------------|---------------------|------------------|-----------------|
| CD45RA        | BB515               | HI100        | BD Biosciences      | 564552           | 1 in 400        |
| CD4           | PerCP-Cy5.5         | OKT4         | Biologend           | 317428           | 1 in 50         |
| CXCR3         | PE-CF594            | 1C6/CXCR3    | BD Biosciences      | 562451           | 1 in 50         |
| PD1           | PE-Cy7              | EH12.1       | BD Biosciences      | 561272           | 1 in 50         |
| CD3           | AF700               | OKT3         | Biologend           | 317340           | 1 in 50         |
|               | Sytox Blue          |              | Invitrogen          | S34857           | 1 in 1000       |
| CCR6          | BV650               | 11A9         | BD Biosciences      | 563922           | 1 in 50         |
| CXCR5         | BV711               | J252D4       | Biologend           | 356933           | 1 in 50         |

18

19 **Supplementary Table S9:** Antibody panel for sort purification of Tfh cells for scRNAseq of CHMI  
 20 samples

| <u>Target</u>   | <u>Fluorochrome</u> | <u>Clone</u> | <u>Manufacturer</u> | <u>Catalog #</u> | <u>Dilution</u> |
|-----------------|---------------------|--------------|---------------------|------------------|-----------------|
| <b>Stain 1:</b> |                     |              |                     |                  |                 |
| TCR gD          | FITC                | B1           | Biologend           | 331208           | 3 in 25         |
| CXCR5           | BV711               | J252D4       | Biologend           | 356933           | 2 in 25         |
|                 |                     |              |                     |                  |                 |
| <b>Stain 2:</b> |                     |              |                     |                  |                 |
| CD4             | PerCpCy5.5          | OKT4         | Biologend           | 317428           | 1 in 50         |
| CD19            | PE                  | HIB19        | BD Biosciences      | 555413           | 1 in 100        |
| PD1             | PE-Cy7              | EH12.1       | BD Biosciences      | 563922           | 1 in 50         |
| Vd2             | APC                 | B6           | Biologend           | 331418           | 1 in 50         |
| CD3             | AF700               | OKT3         | Biologend           | 317340           | 1 in 50         |
|                 | Sytox Blue          |              | Invitrogen          | S34857           | 1 in 1000       |
| CD56            | BV510               | HCD56        | Biologend           | 318340           | 1 in 100        |
| CD45RA          | BV570               | HI100        | Biologend           | 304132           | 1 in 400        |
| HLADR           | BV785               | L243         | Biologend           | 307642           | 1 in 200        |

21

22

23

24 **Supplementary Figures**

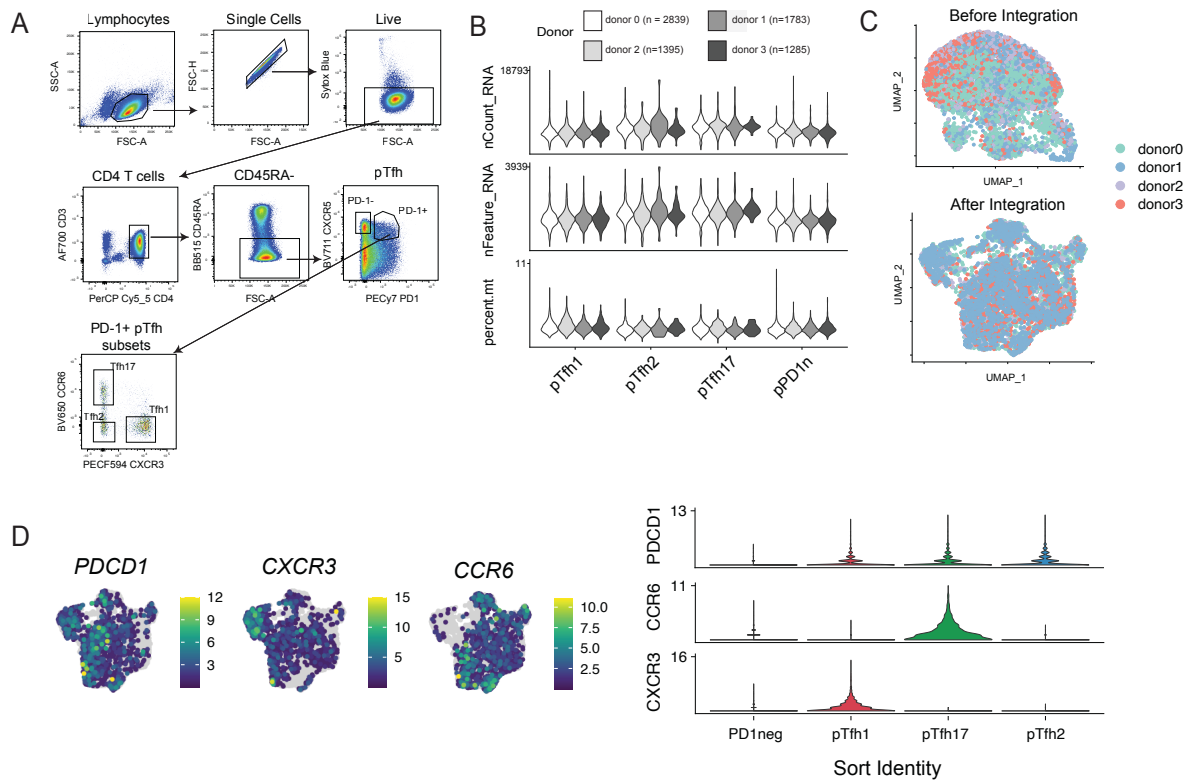

25

26 **Supplementary Figure 1. Single cell RNA sequencing of pTfh cells from healthy donors.**

27 **A)** Gating strategy for sorting pTfh cell populations scRNAseq. Non-naïve CD4 T cells were identified  
 28 as CD3+/CD4+, CD45RA- cells. Tfh1 (CXCR3+CCR6-), Tfh2 (CXCR3-CCR6-), Tfh17(CXCR3-  
 29 CCR6+) were sorted from CXCR5+PD1+ cells, and a resting Tfh cell population from  
 30 CXCR5+PD1- cells. **B)** QC of cells from each donor and subset, nCount\_RNA, nFeature\_RNA and  
 31 percent mitochondrial content is shown. **C)** UMAP of data before and after integration for donor. **D)**  
 32 Gene expression of key phenotyping markers PD1 (encoded by PDCD1), CXCR3 and CCR6 used to  
 33 sort Tfh subsets phenotypically. UMAP and Vlnplot in each sorted population shown.

34

35

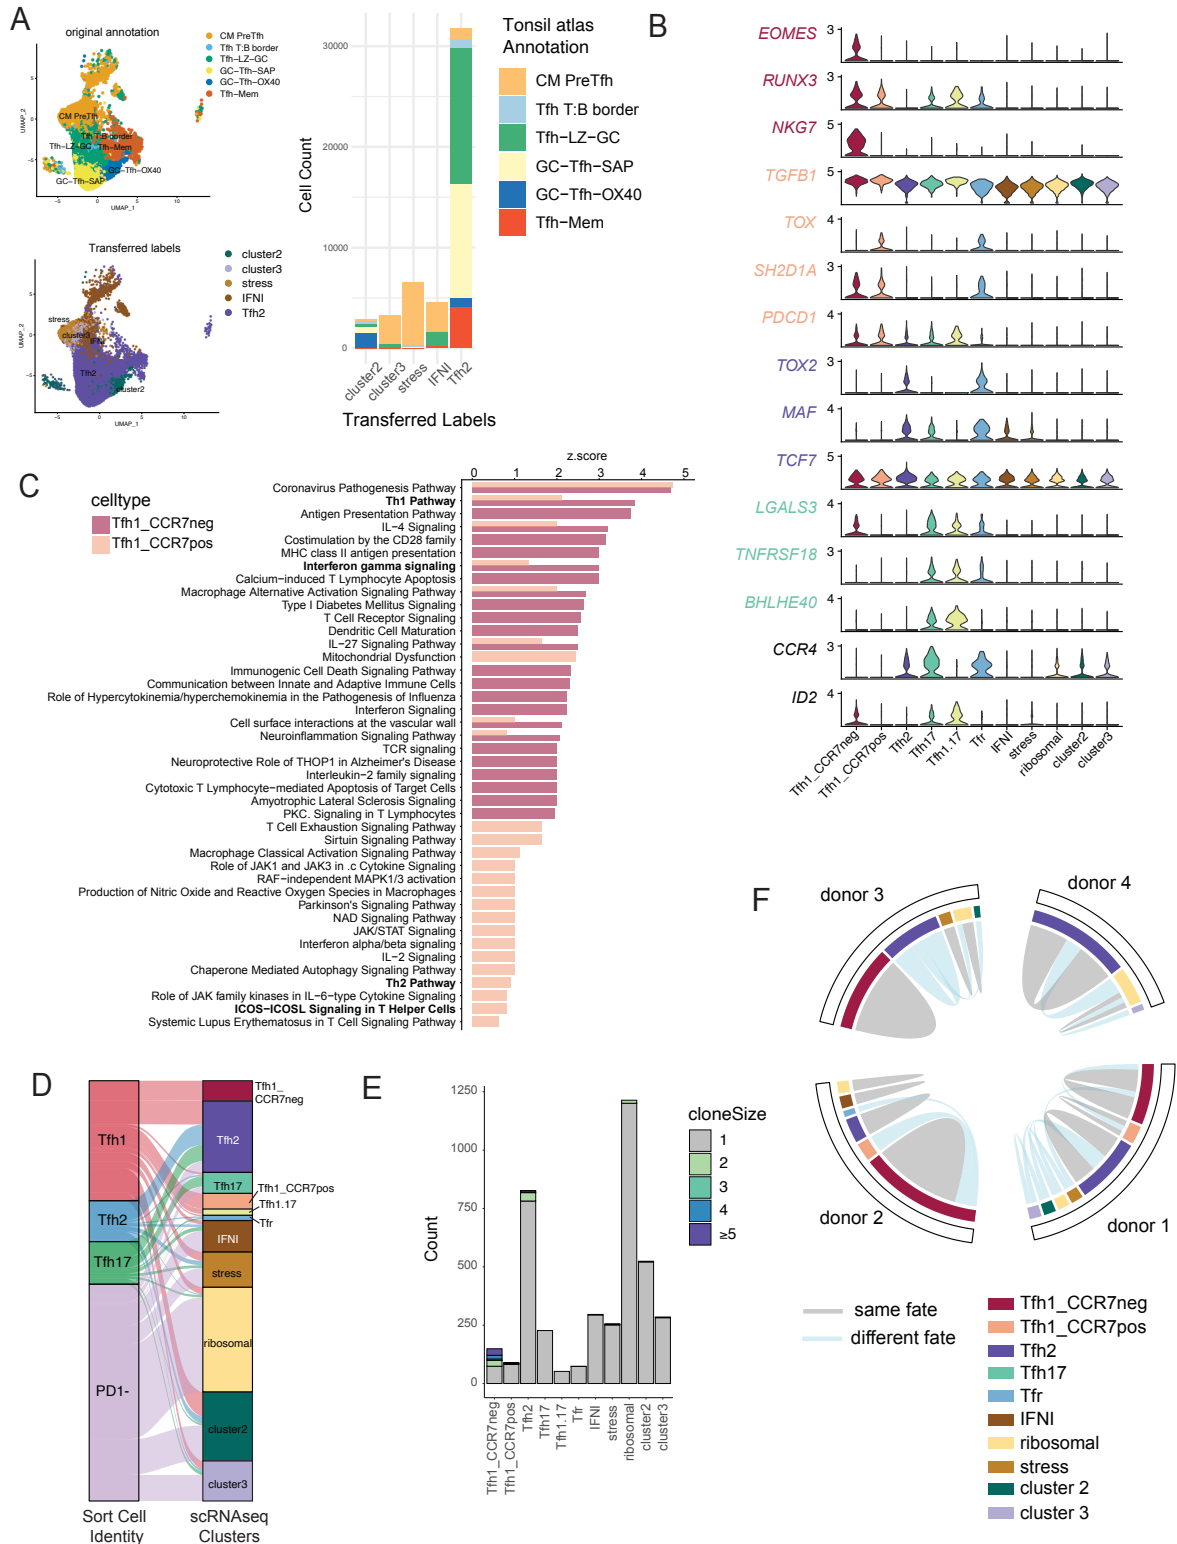

36

37 **Supplementary Figure 2. Cluster identification in single cell RNA sequencing of pTfh cells from**  
 38 **health donors**

39 **A)** UMAP and bar chart showing the number of cells in each predicted cell cluster grouped by their  
 40 original cell annotation from the human tonsil atlas. **B)** Expression of genes with various roles in Tfh  
 41 and CD4 T cell development across different Tfh cell clusters. **C).** Ingenuity Pathway Analysis  
 42 identified top 25 pathways from cluster marker genes (relative to all other Tfh clusters) for Tfh1-  
 43 CCR7<sup>neg</sup> and Tfh1-CCR7<sup>pos</sup> subsets. Number of genes identified in enriched pathway indicated for

44 *each subset. Pathways of interest in bold. **D**) Relationship between cell sorted identity and*  
45 *transitional cell cluster identify. **E**) Frequency of individual clones that occurred with clonal size of 1,*  
46 *2, 3, 4, >5 in each subset. **F**) Circos plot of clonal overlap between subsets. Each cell of clones ( $\geq 2$ ) is*  
47 *represented in a node in the ring, with a cell of each clone indicated by the inner coloured ring and*  
48 *donor by the outer labelled ring. Clones that exist in a single Tfh subset are joined by grey lines,*  
49 *while clones that are shared across Tfh subsets are joined by light blue lines. No clones were shared*  
50 *across donors.*

51

52

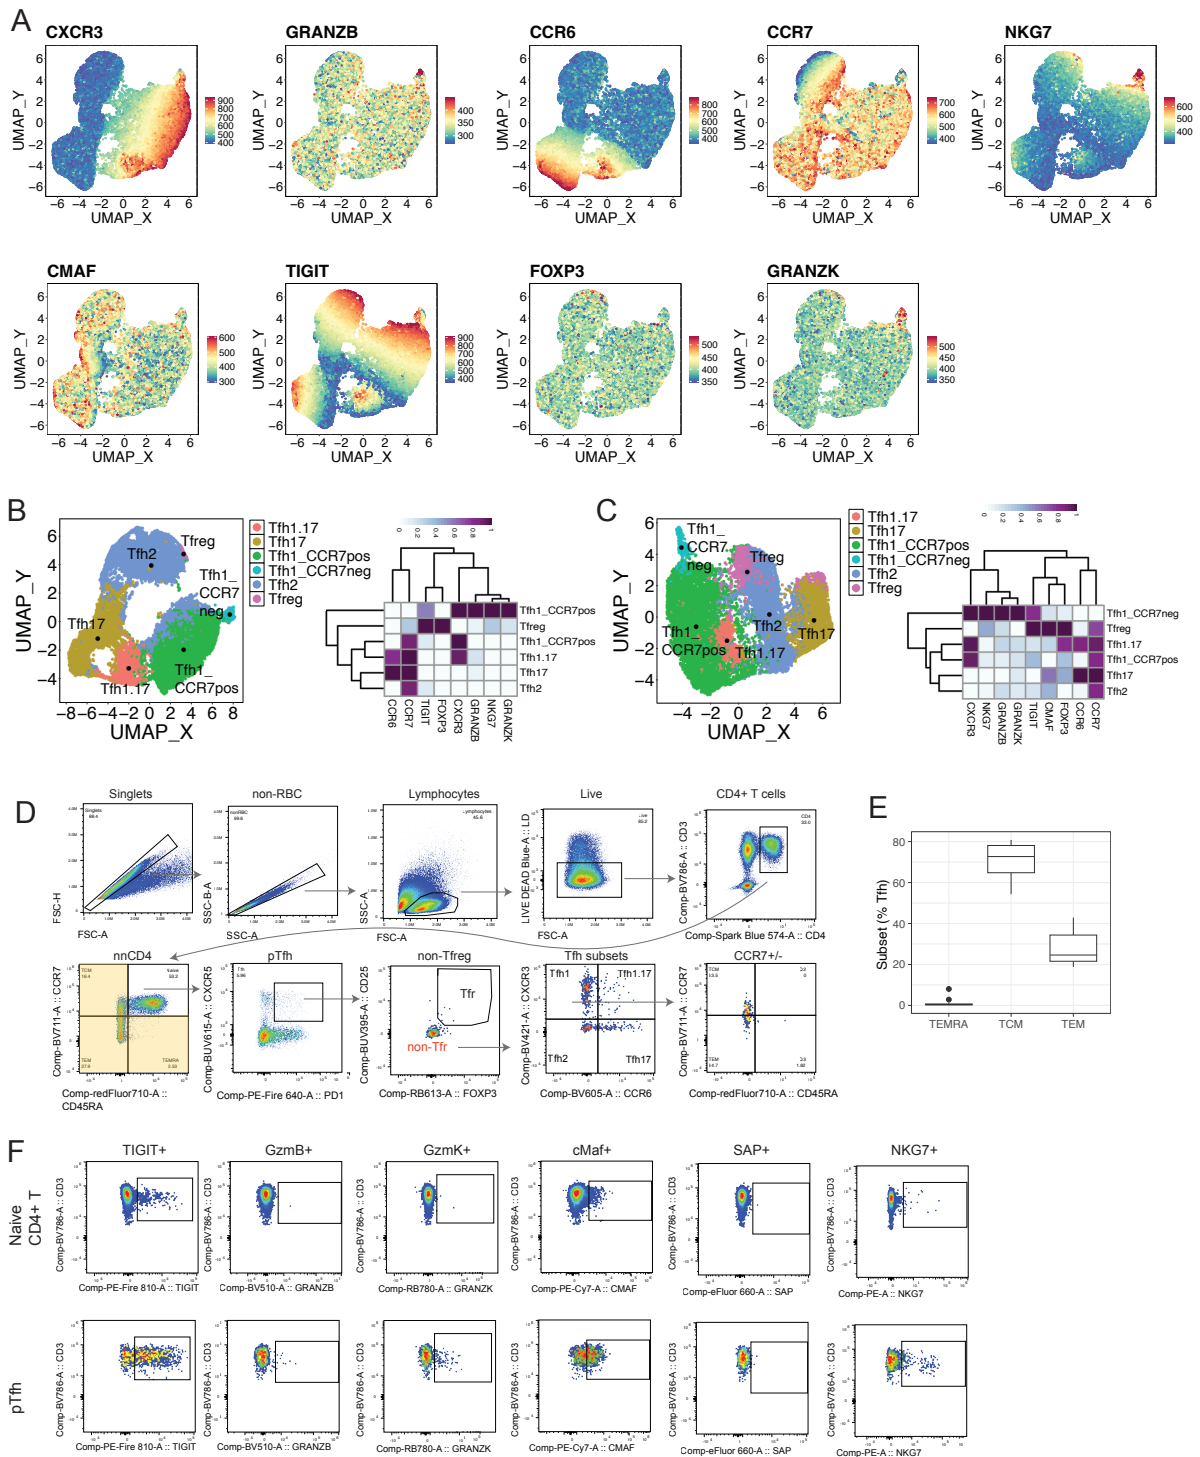

53

54 **Supplementary Figure 3: Phenotypic diversity within pTfh subsets based on CCR7 expression.**

55 **A)** Expression of each marker used in unbiased analysis (see Figure 2). **B/C)** UMAP of unbiased  
 56 analysis of a single experiment ( $n=6$  for B and  $n=6$  for C). **D)** Gating strategy for identify pTfh cells.  
 57 pTfh cells were identified as CXCR5+PD1+ non-naïve CD4 T cells. Within pTfh cells, Tfr cells were  
 58 identified as FoxP3+/ $CD127^0$  cells, pTfh subsets identified based on CXCR3 and CCR6, and CCR7  
 59 expression analysed. **E)** Proportion of central memory (TCM, CCR7+CD45RA-), effector memory  
 60 (TEM, CCR7+CD45RA-) and effector memory re-expressing CD45RA (TEMRA, CCR7-/CD45RA+)  
 61 cells within Tfh cell population. **F)** Marker expression in naïve CD4 T cells and pTfh cells.

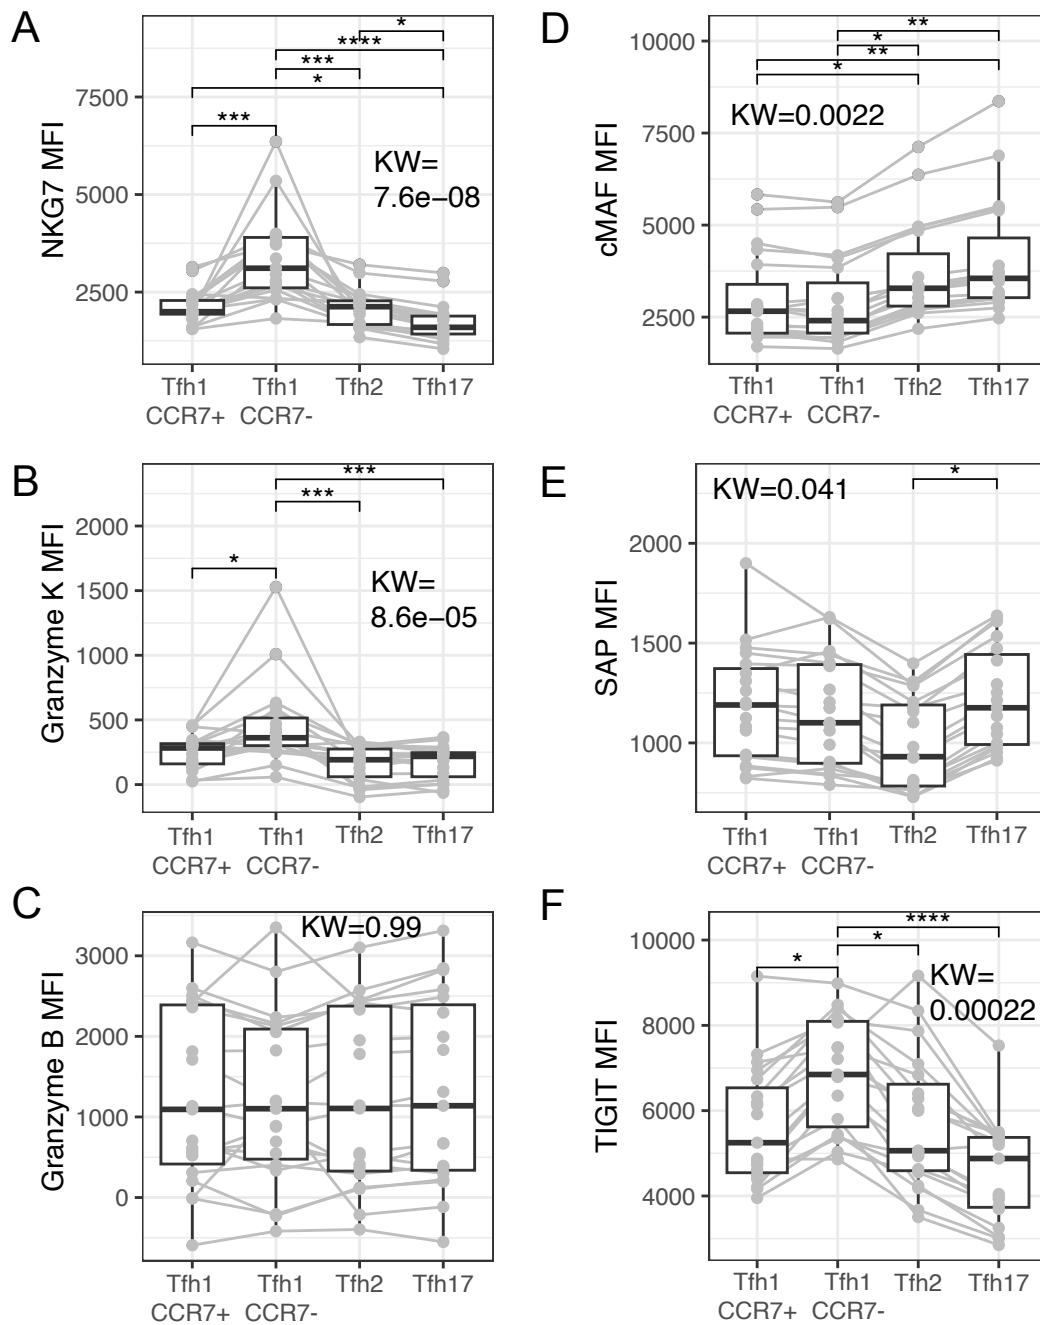

63

64 **Supplementary Figure 4: Marker expression as MFI on Tfh subsets identified by flow cytometry.**

65 **A) NKG7, B) granzyme K, C) granzyme B, D) cMAF, E) SAP and F) TIGIT MFI on each Tfh**  
 66 **subset/phenotypic state in healthy individuals (n=19). Data are marker expression as MFI for each**  
 67 **Tfh subset. Kruskal-Wallis test is used for the global comparison. P is post-hoc dunns test with FDR**  
 68 **correction for multiple comparisons. Only significant differences ( $p < 0.05$ ) are shown. \*  $< 0.05 - < 0.01$ ,**  
 69 **\*\*  $< 0.01 - < 0.001$ , \*\*\*  $< 0.001$ .**

70

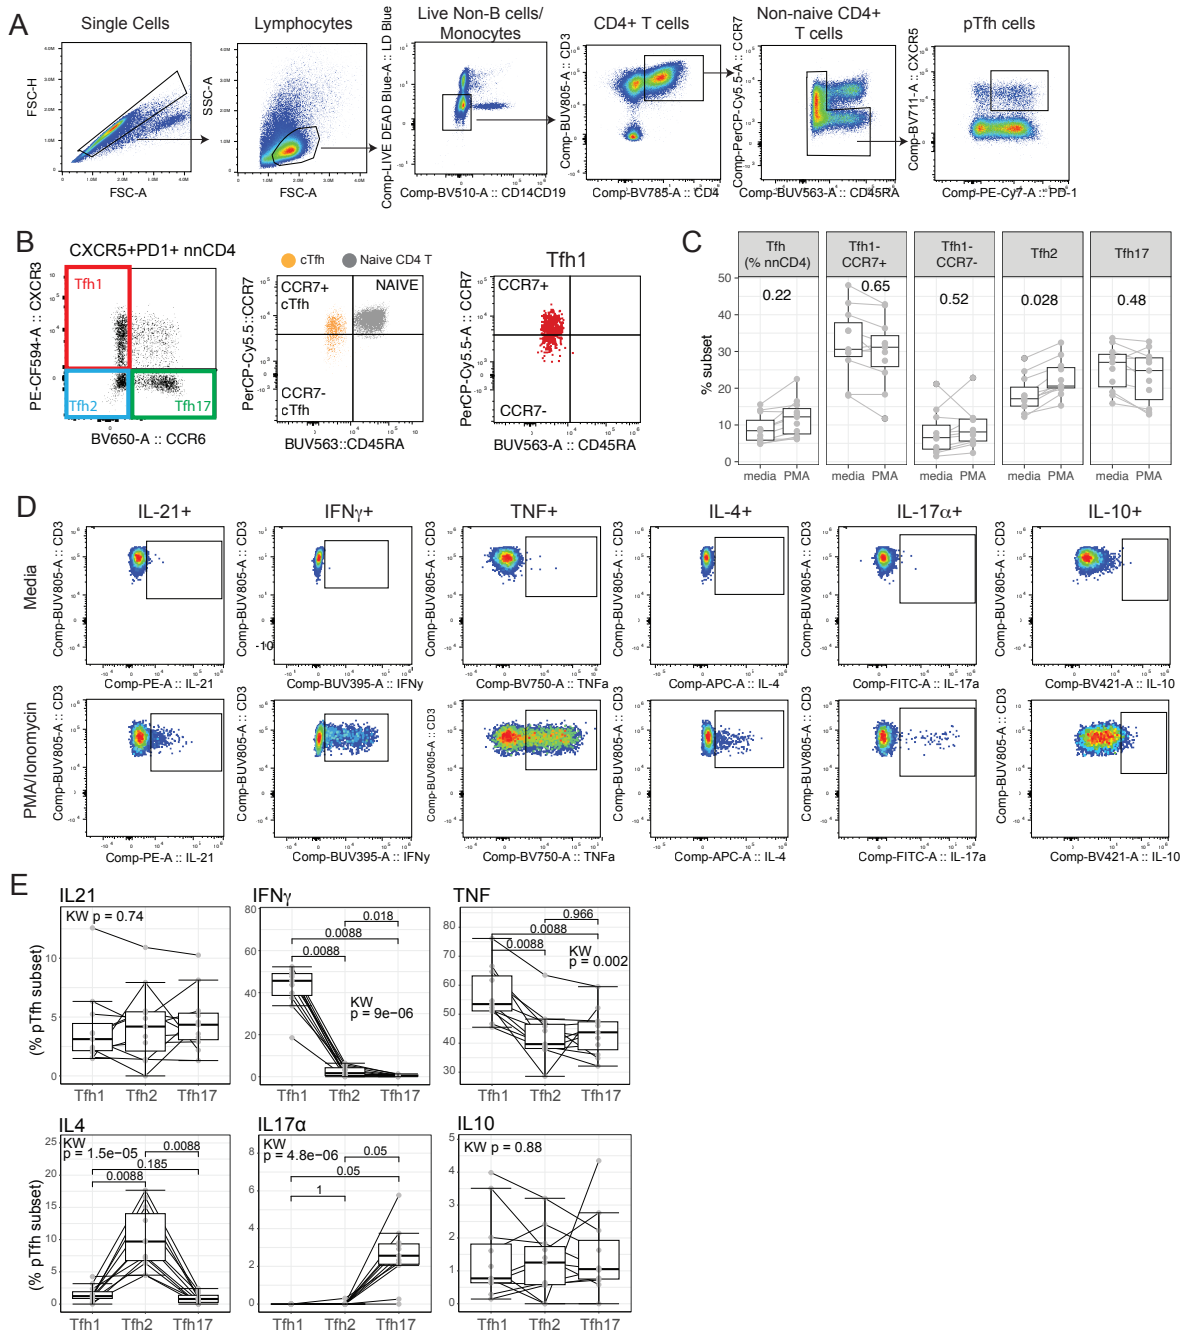

71

72 **Supplementary Figure 5: Gating strategy for pTfh cells and cytokine expression following PMA/Io**  
 73 **stimulation.**

74 PBMCs were stimulated with PMA/Ionomycin to assess cytokine production. **A)** pTfh cells were  
 75 identified as CXCR5+PD1+ CD4 T cells. **B)** A gradient of CCR7 could be detected within pTfh1 cell  
 76 subsets, and pTfh1 clusters can be divided into CCR7<sup>pos</sup> and CCR7<sup>neg</sup> cells. **C)** Subset distribution  
 77 before and after stimulation. Tfh is % of non-naïve CD4, while Tfh subsets are % of total Tfh. P is the  
 78 paired Wilcoxon signed-rank test. **D)** Representative data of cytokine expression in pTfh cells in  
 79 unstimulated (media) or PMA/Ionomycin stimulated cells. **E)** pTfh cells subsets were identified by  
 80 CXCR3 and CCR6 expression as pTfh1 (CXCR3+CCR6+), pTfh2 (CXCR3-CCR6-) and pTfh17  
 81 (CXCR3-CCR6+) cells (grouping CCR7<sup>pos</sup> and CCR7<sup>neg</sup> Tfh1 cells). P is the paired Wilcoxon signed-  
 82 rank test between groups, adjusted for multiple comparisons with Holm's FDR, and Kruskal Wallis  
 83 group comparison test.

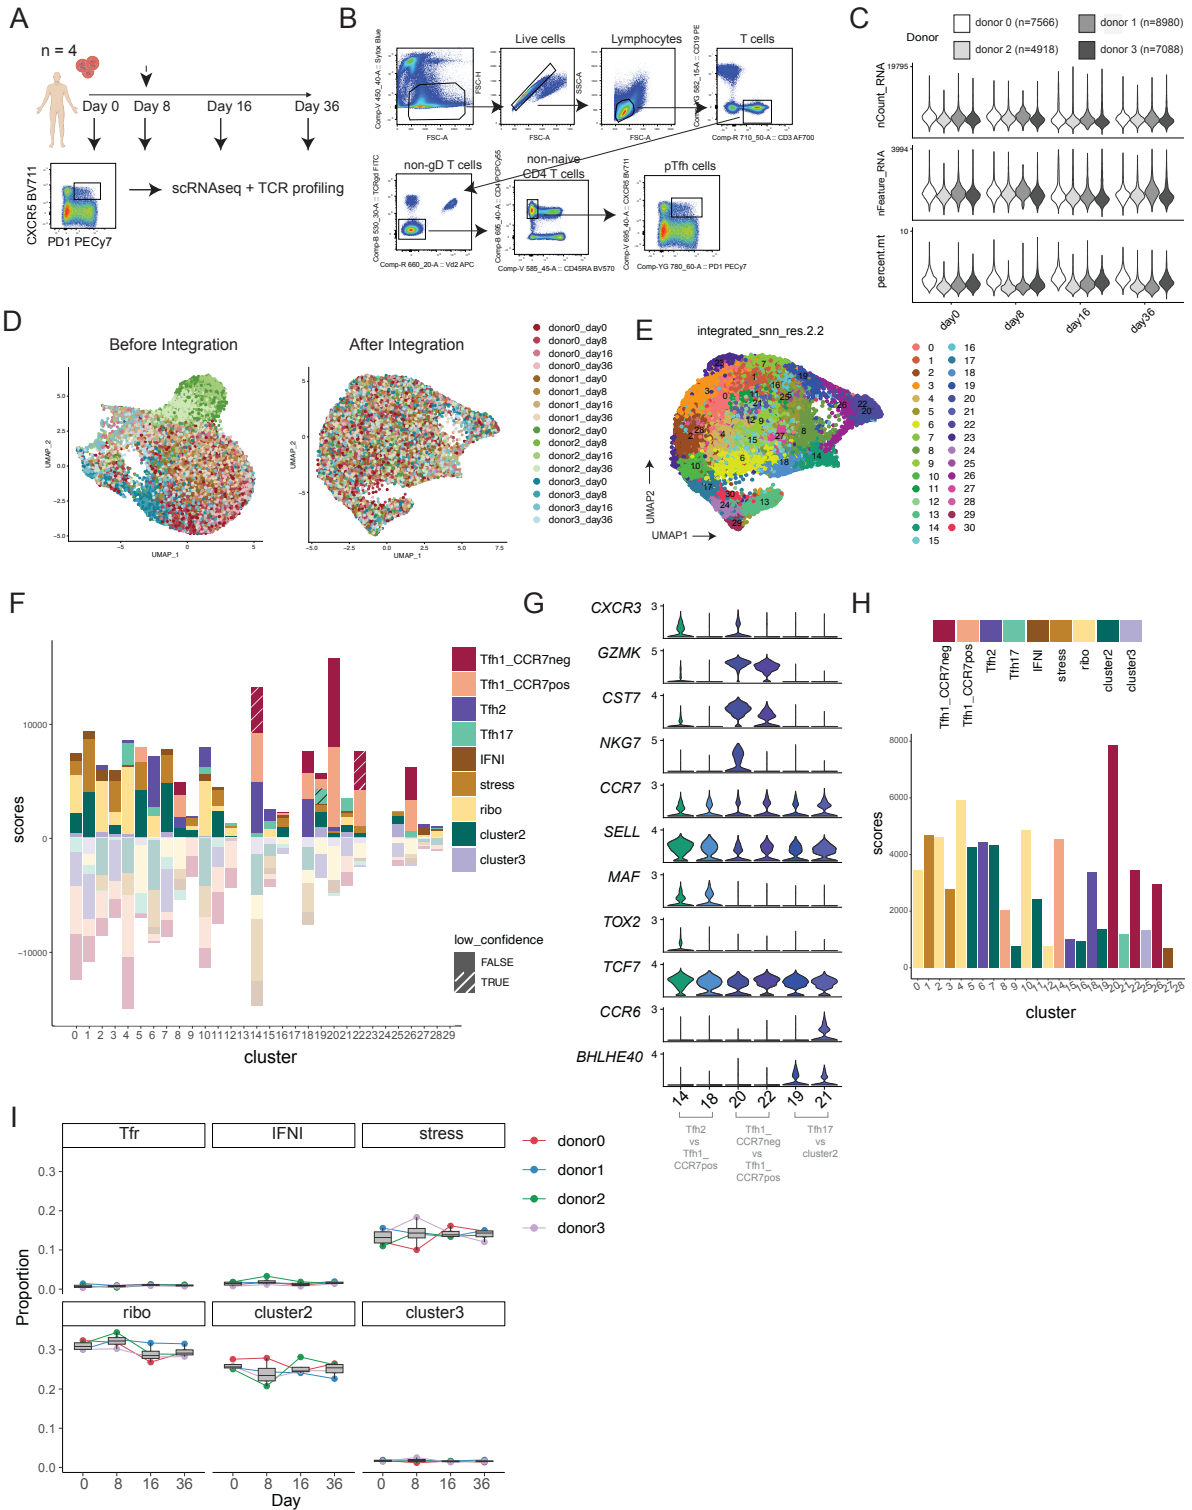

84

85 **Supplementary Fig 6. scRNAseq analysis of Tfh cells in CHMI**

86 *A) scRNAseq experimental set up for Tfh cells during controlled human malaria infection (CHMI).*  
 87 *Tfh cells (CXCR5+PD1+) identified within non-naive CD4 T cells were sorted from four individuals*  
 88 *at day 0, 8, 16 and end-of-study during CHMI. Individuals were treated at day 8 (indicated by dotted*  
 89 *arrow). B) Gating strategy for Tfh cell sorting for scRNAseq. C) QC of data from each donor across*  
 90 *time points nCount\_RNA, nFeature\_RNA and percent mitochondrial content is shown. D) Data before*  
 91 *and after integration based on donor and CHMI day. E) Over clustering of data prior to scType label*

92 *transferer. F) scType was used to label transfer cell signatures (top 20 up and down regulated genes)*  
93 *for each cell subset identified in healthy 'map' data onto over-clustered CHMI data. Each cell cluster*  
94 *was scored for each reference signature (left), and the majority score (right) used to collapse clusters*  
95 *into cell subsets. G) Average expression of Tfh cell cluster markers in each subset for manual*  
96 *adjustment of "low-confidence" predicted cluster identities. H) Final predicted label for each cell*  
97 *cluster. I) Proportion of other Tfh cell subsets identified over time.*

98

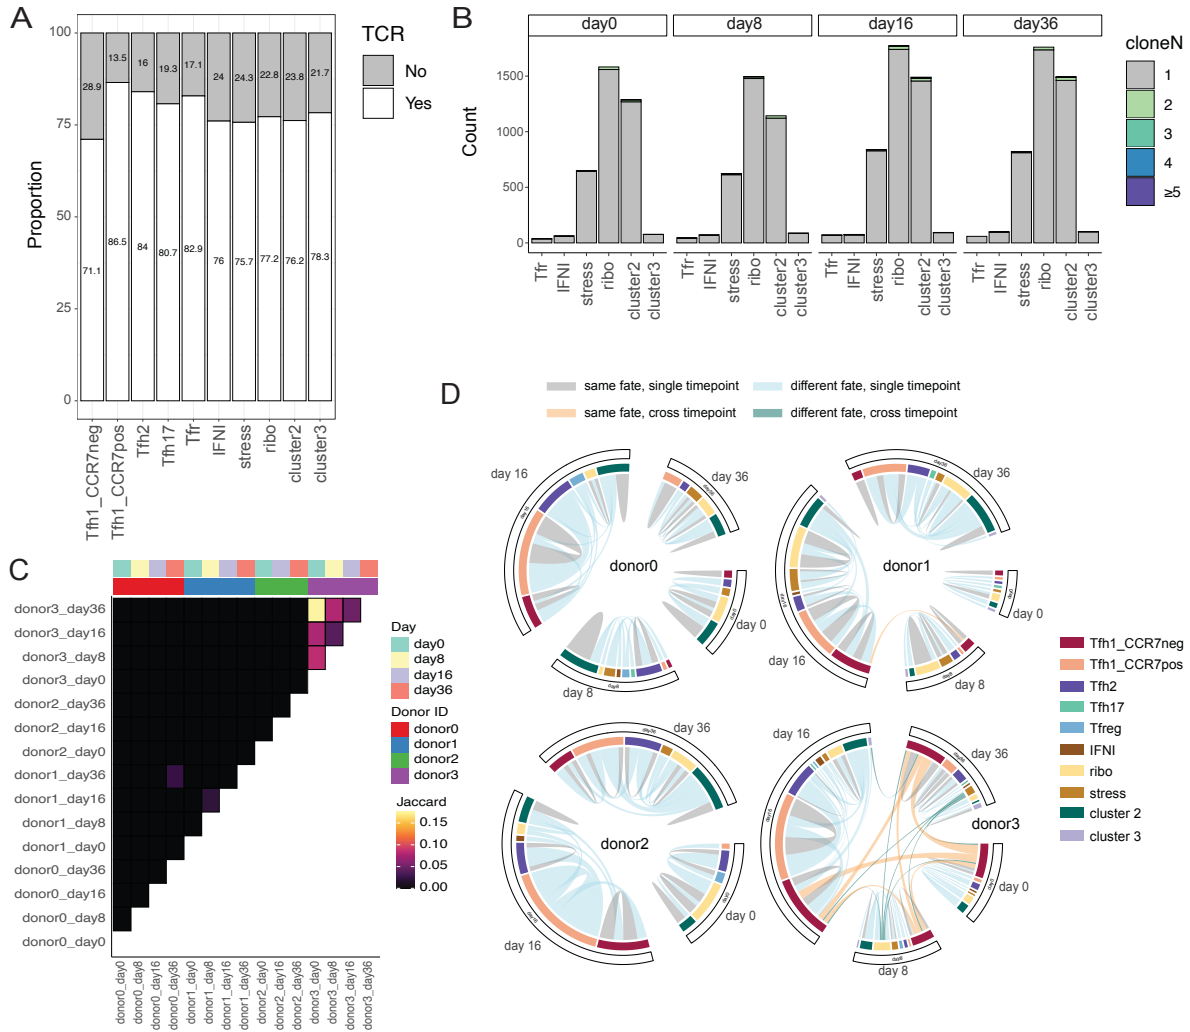

99

100

101 **Supplementary Figure 7: TCR analysis of Tfh cells in CHMI**

102 **A)** Proportion of cells with TCR captured across each subset. **B)** Clonal size of other Tfh cell subsets  
 103 identified over time. **C)** Clonal overlap between donor and day. **D)** Circos plot of clonal overlap  
 104 between subsets for each donor. Each cell of clones ( $\geq 2$ ) is represented in a node in the ring, with a  
 105 cell of each clone indicated by the inner coloured ring and donor by the outer labelled ring. Clones  
 106 that exist in a single Tfh subset are joined by grey lines, clones that exist in a single Tfh subset across  
 107 more than one timepoint are in peach, clones that are shared across different Tfh subsets at a single  
 108 timepoint are joined by light blue lines, and clones that are shared across different Tfh subsets and  
 109 different timepoints are in green. No clones were shared across donors.

110

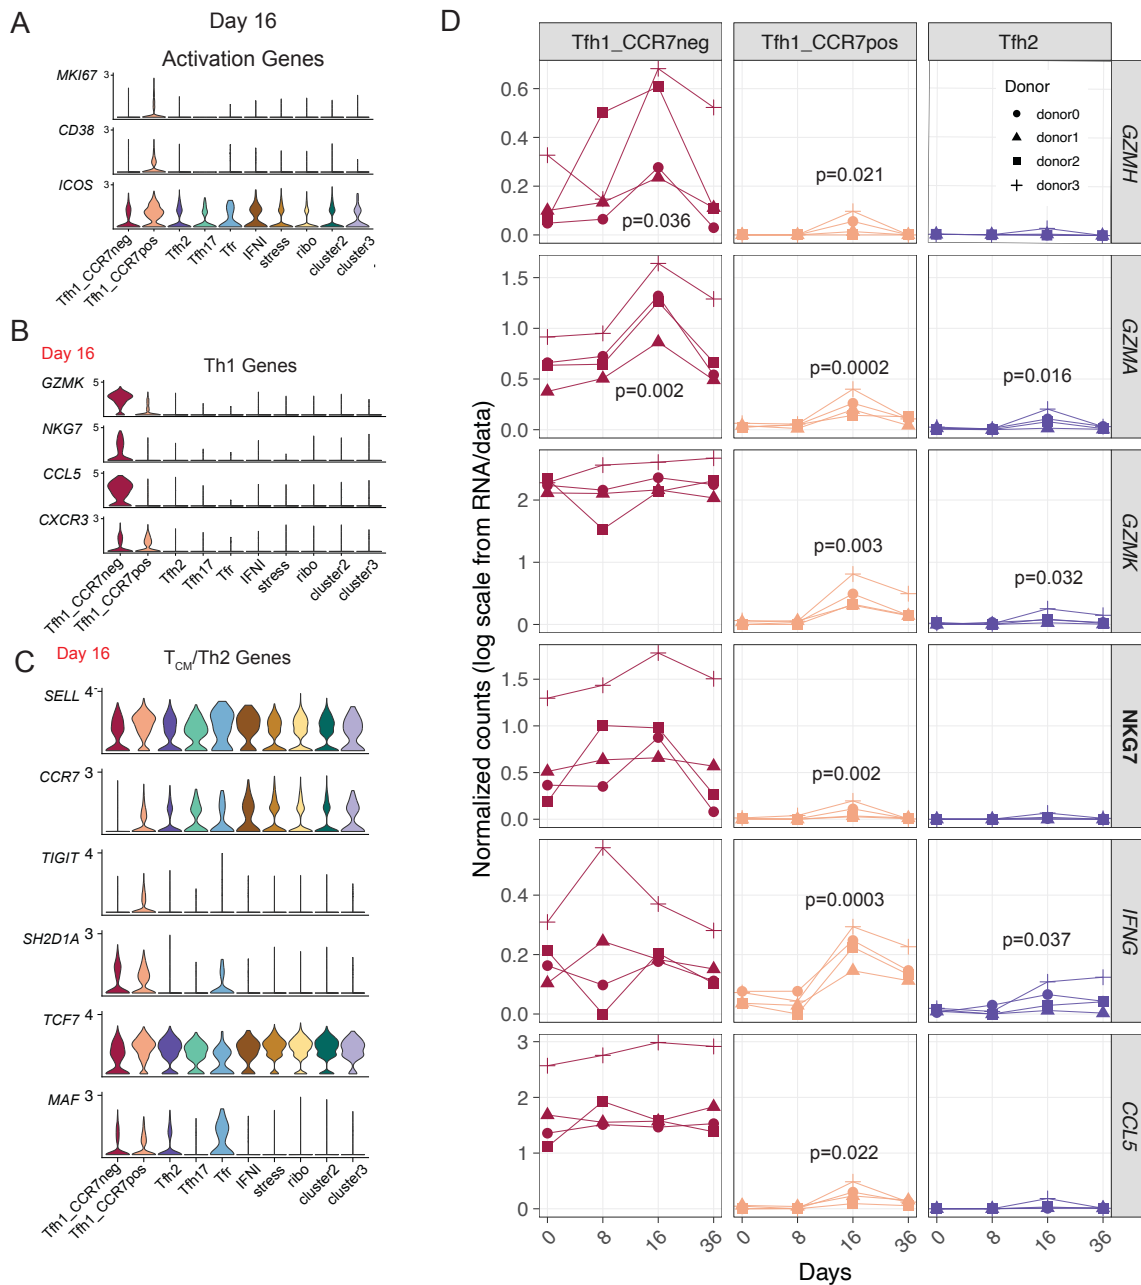

111

112 **Supplementary Figure 8: Tfh cell activation profiles at day 16 following CHMI**

113 *DEGs were identified in each subsets comparing day 0 to subsequent time points during infection. A)*

114 *Expression of activation genes for all clusters at Day 16. B-C) Despite upregulation of genes*

115 *associated with inflammation, expression profiles were still different between Tfh1\_cyto and*

116 *Tfh1\_CCR7 subsets. Tfh cell subsets maintained expression profiles of identifying cluster markers.*

117 **D) Expression of selected inflammatory and cytotoxic genes in each individual in each Tfh subset at**

118 *day 0, 8, 16 and 36 of CHMI. P is adjusted from pseudobulk analysis at day 16 compared to Day 0.*

119

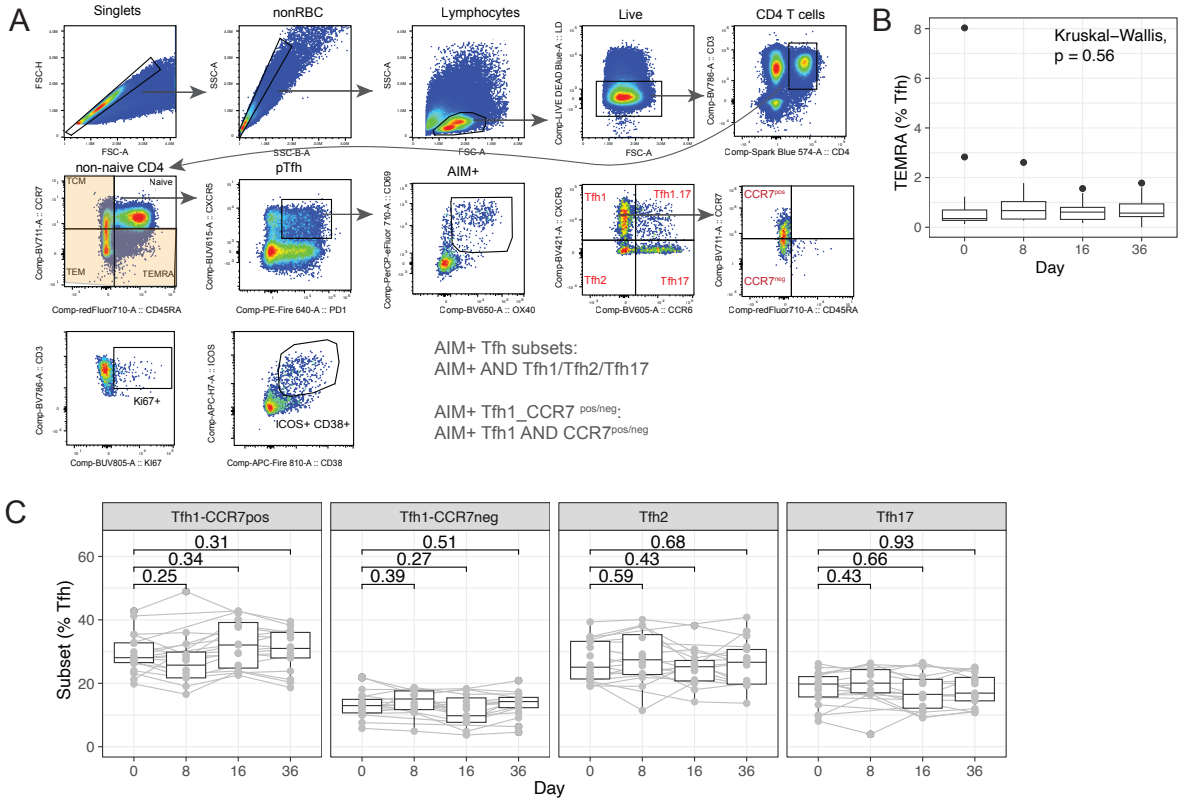

120

121 **Supplementary Figure 9: Validating Tfh cell profiles in CHMI**

122 **A)** Gating strategy for identification of malaria specific pTfh cells in individuals undergoing CHMI  
 123 using Activation Induced Marker assay. **B)** Proportion effector memory re-expressing CD45RA  
 124 (TEMRA, CCR7-/CD45RA+) within total Tfh population across CHMI. Kruskal Wallis indicated. **C)**  
 125 Frequencies of Tfh subsets within the total Tfh compartment across CHMI. P is Wilcoxon rank-sum  
 126 test.

127

128

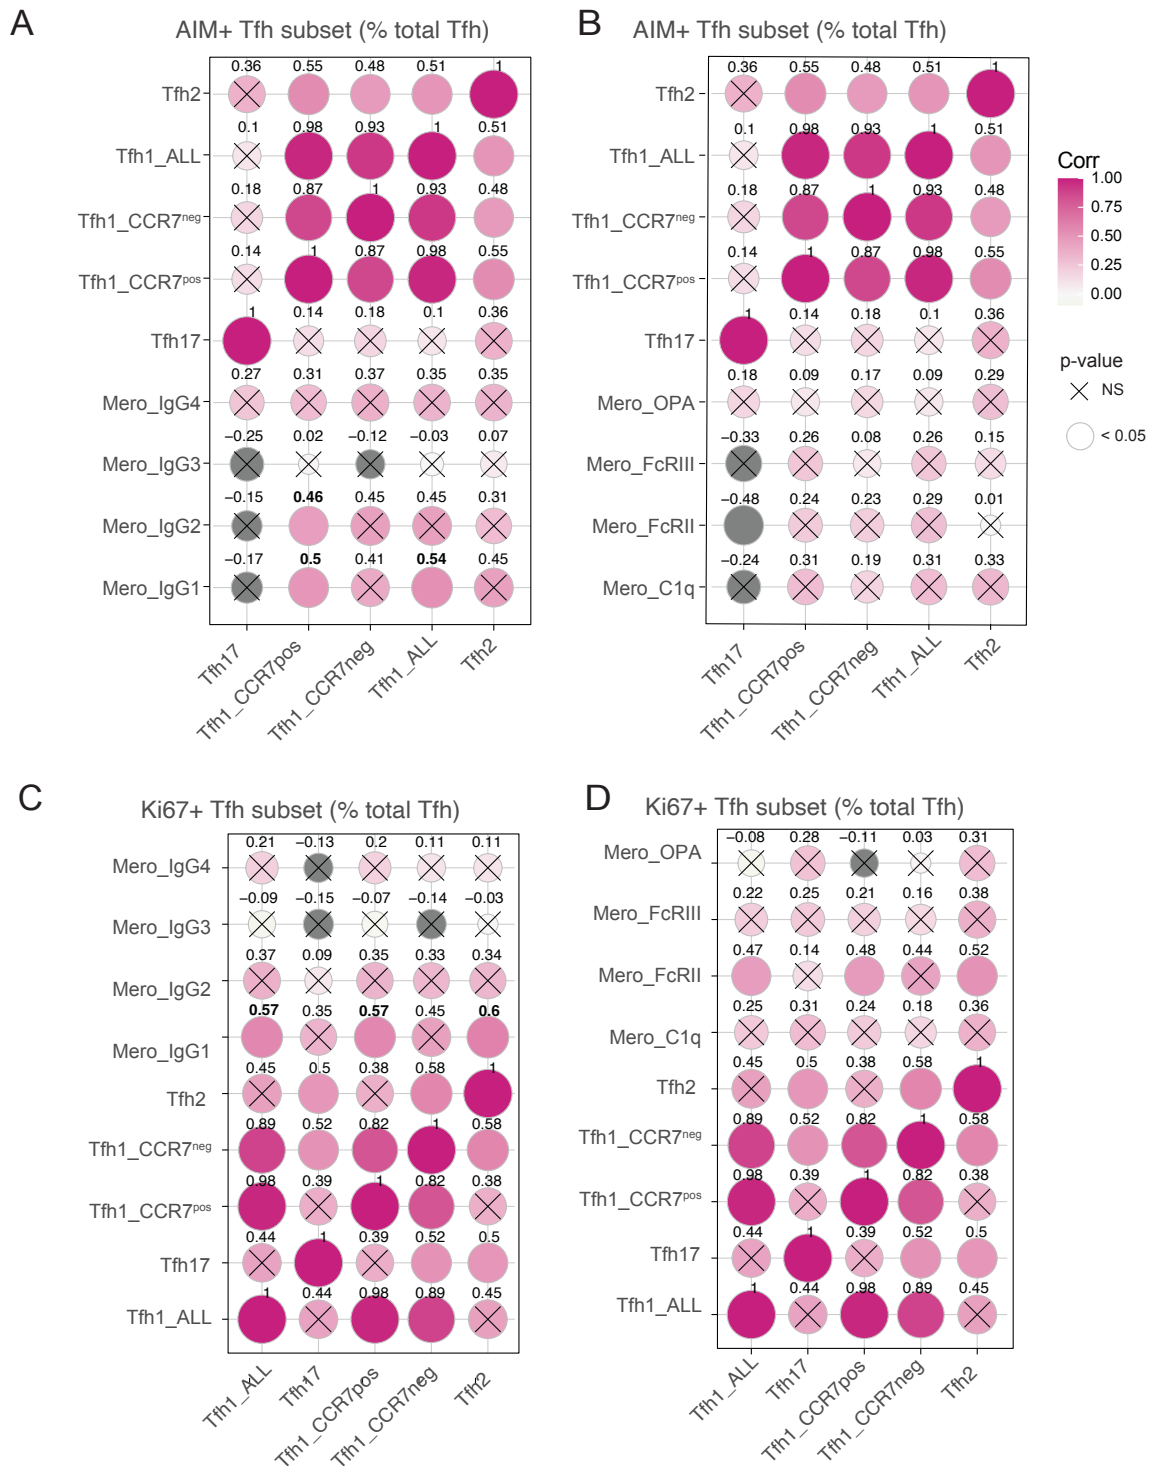

129

130 **Supplementary Figure 10: Correlations between Tfh cells and antibody development in CHMI.**

131 Correlation matrix between malaria-specific Tfh subsets (A/B) or Ki67 expression of Tfh subsets  
 132 (C/D) at day 36 with either IgG subclasses to merozoite (A/C) or functional capacity to fix  
 133 complement (C1q), bind dimeric FcγRIIa or FcγRIIIa (surrogates for IgG antibody capacity to  
 134 crosslink cellular receptors), and promote opsonic phagocytosis (OPA) (B/C). Spearman's rho and p-  
 135 value are indicated.
